# Supplementary material
Source: MDPI journal article supplement (https://www.mdpi.com/search?q=nutrients-11-01118)
Supplement: s001 [file nutrients-11-01118-s001.pdf]

**Supplementary Table S1.** Macronutrient and fatty acid composition of the TWD diet.

| Macronutrient                  | Walnuts (% by weight) |      |      |      |
|--------------------------------|-----------------------|------|------|------|
|                                | 0                     | 3.5  | 7    | 14   |
| <b>Carbohydrates</b>           |                       |      |      |      |
| Corn starch                    | 230                   | 225  | 219  | 211  |
| Maltodextrin                   | 70                    | 70   | 70   | 70   |
| Sucrose                        | 261                   | 261  | 261  | 261  |
| Cellulose                      | 30                    | 30   | 29   | 27   |
| Kcal (% of total)              | 50                    | 50   | 50   | 50   |
| <b>Proteins</b>                |                       |      |      |      |
| Casein                         | 190                   | 184  | 178  | 165  |
| L-Cystine                      | 2.9                   | 2.9  | 2.9  | 2.9  |
| Kcal (% of total)              | 15.5                  | 15.5 | 15.5 | 15.5 |
| <b>Fats</b>                    |                       |      |      |      |
| Olive oil                      | 28                    | 24   | 20   | 12   |
| Soybean oil                    | 31                    | 27   | 23   | 14   |
| Corn oil                       | 17                    | 14   | 12   | 7    |
| Lard, pork                     | 28                    | 24   | 20   | 12   |
| Beef tallow                    | 25                    | 21   | 18   | 11   |
| Anhydrous milk fat             | 26                    | 31   | 26   | 16   |
| Cholesterol                    | 0.4                   | 0.4  | 0.4  | 0.4  |
| Walnuts                        | 0                     | 35   | 70   | 140  |
| Kcal (% of total)              | 34.5                  | 34.6 | 34.9 | 35.0 |
| <b>Fatty acids</b>             |                       |      |      |      |
| Oleic acid                     | 64.3                  | 58.3 | 52.5 | 40.2 |
| Linoleic acid                  | 33.3                  | 41.9 | 50.9 | 67.6 |
| $\alpha$ -Linoleic acid        | 3.5                   | 6.1  | 8.9  | 14.1 |
| Saturated fat                  | 59.7                  | 53.4 | 43.0 | 26.1 |
| Kcal from Walnuts (% of total) | 0                     | 5.2  | 10.5 | 21.4 |

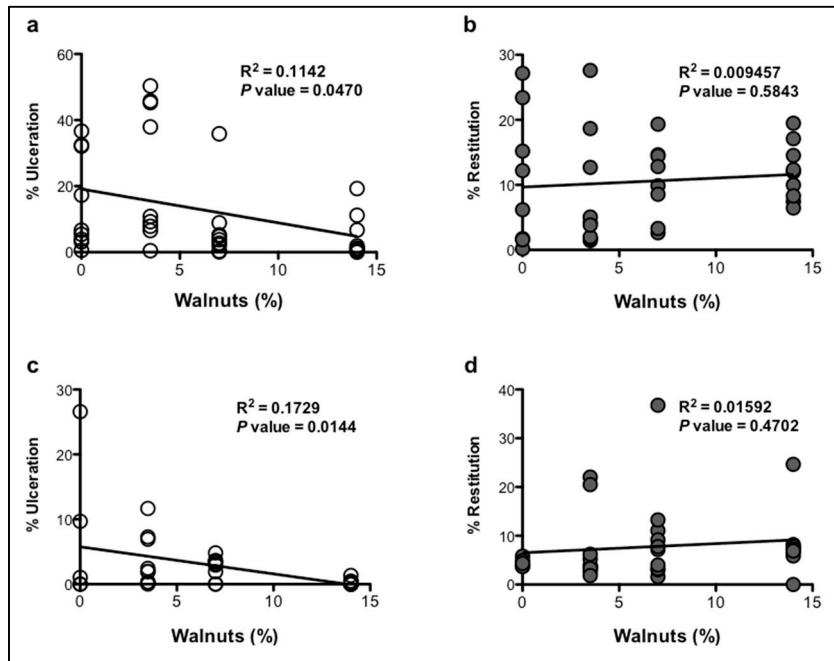

**Supplementary Figure S1.** Linear-regression analyses of % ulceration (a) and % restitution (b) in DSS-induced acute colitis, and % ulceration (c) and % restitution (d) in the recovery from DSS-induced colitis.
